# Supplementary figures and images for: Translational Pharmacokinetic/Pharmacodynamic Modeling of Tumor Growth Inhibition Supports Dose‐Range Selection of the Anti–PD‐1 Antibody Pembrolizumab
Source: PubMed Central journal article supplement — CPT Pharmacometrics Syst Pharmacol. 2016 Nov 8;6(1):11–20. doi: 10.1002/psp4.12130 (PMC5270293; doi:10.1002/psp4.12130), 2016-11-08

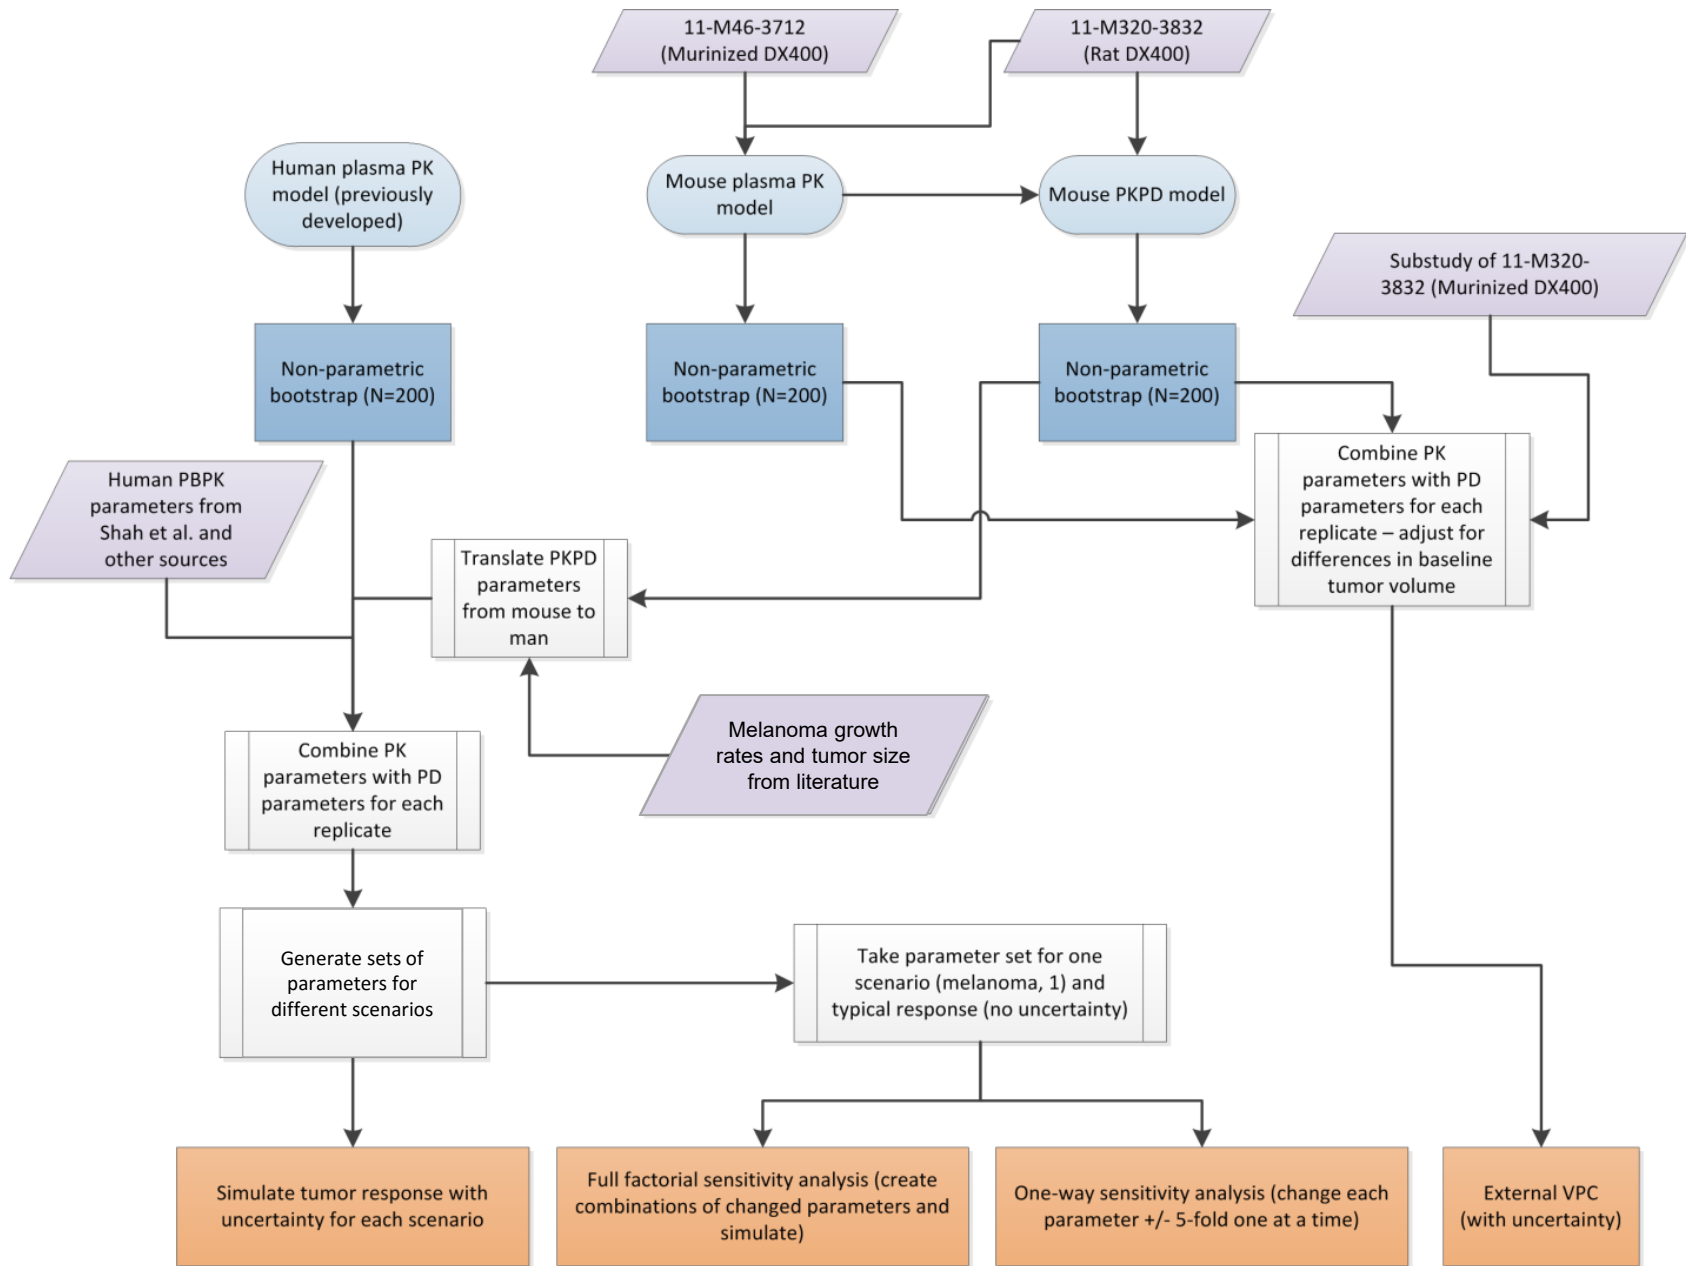

Supplement: PSP4-6-11-s003.pdf [file PSP4-6-11-s003.pdf]

a.

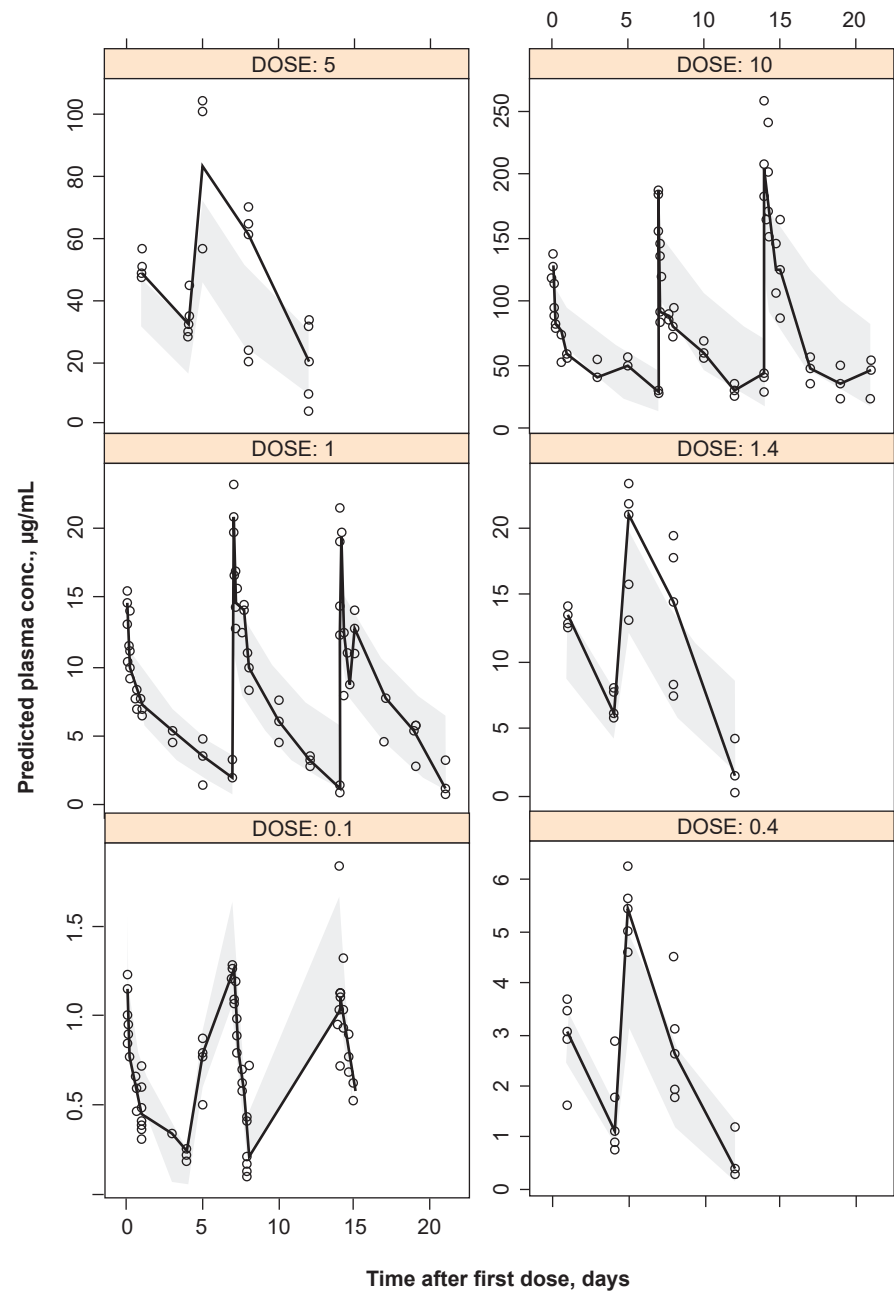

b.

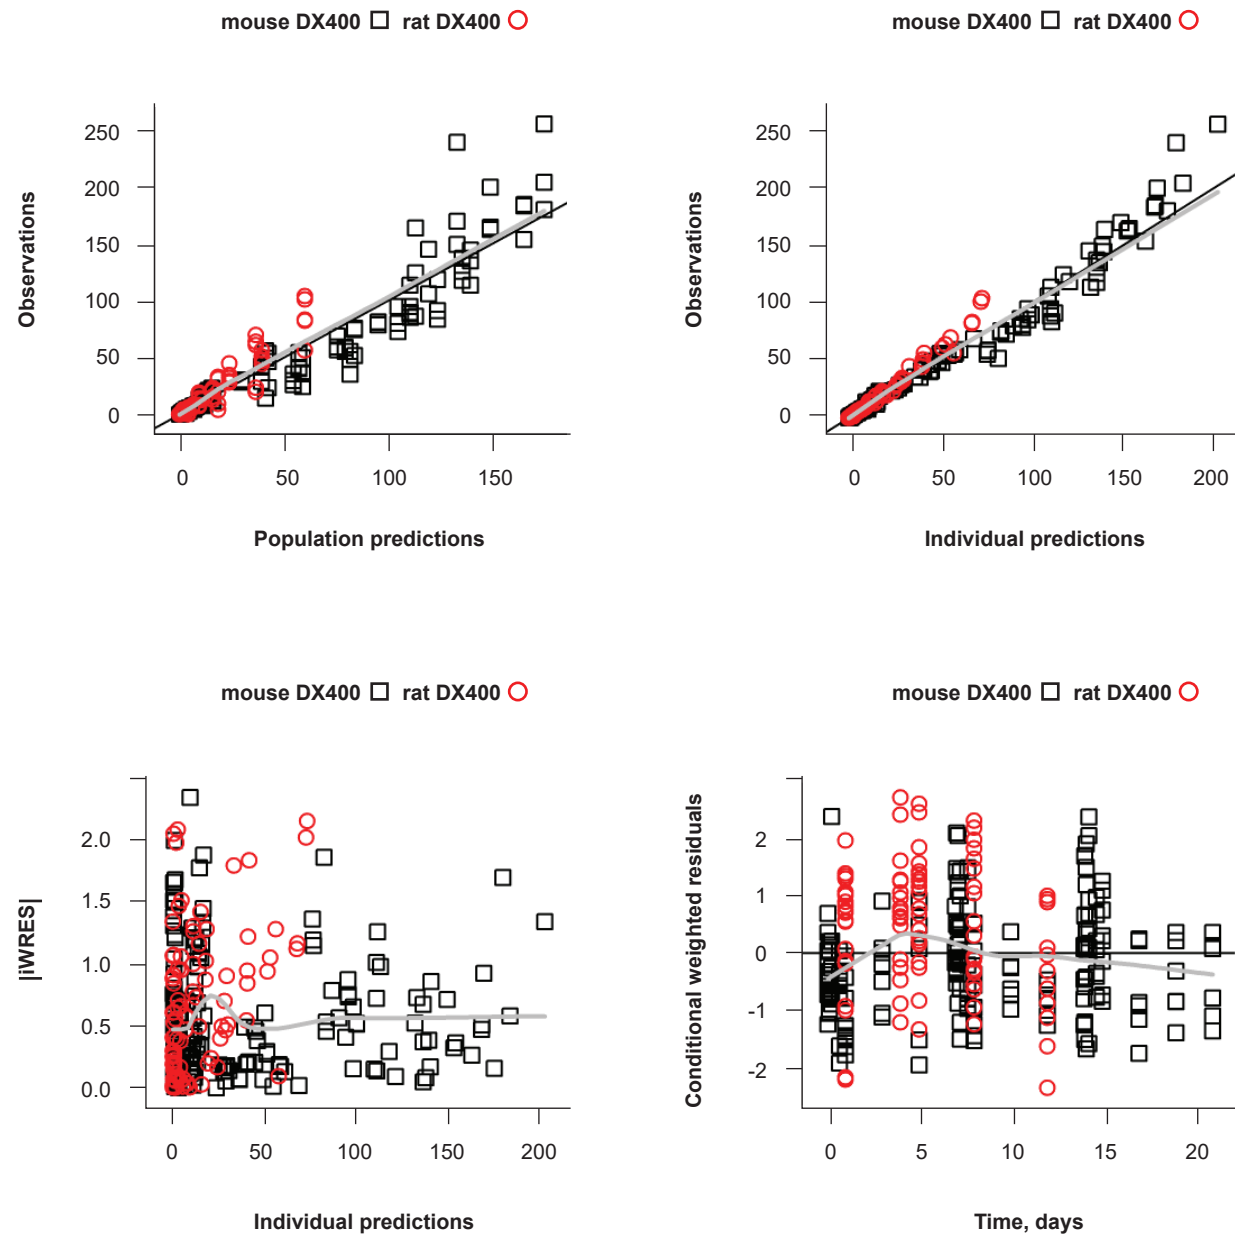

Supplement: PSP4-6-11-s004.pdf [file PSP4-6-11-s004.pdf]

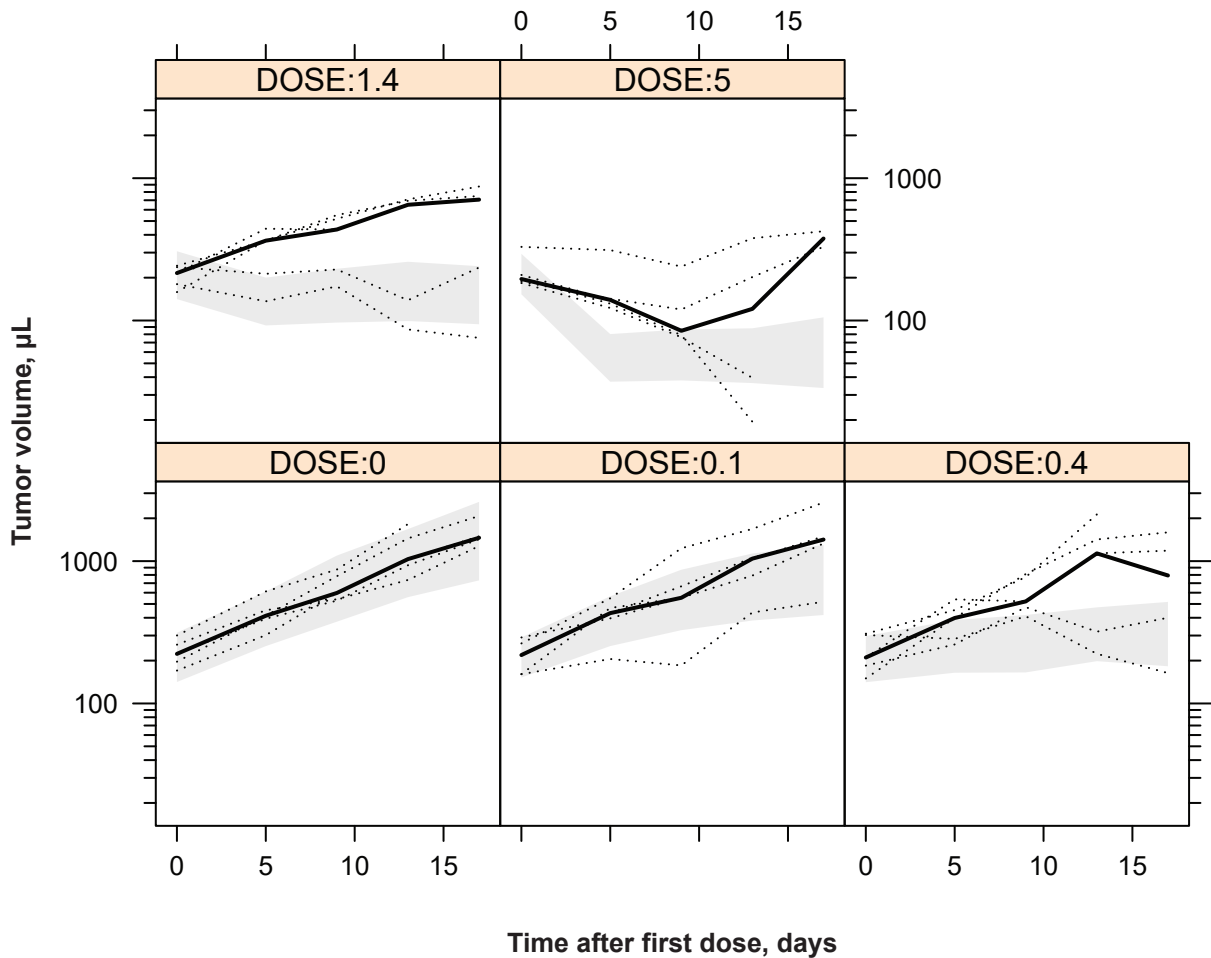

Supplement: PSP4-6-11-s005.pdf [file PSP4-6-11-s005.pdf]
